# Supplementary material
Source: publisher figshare collection journal article supplement (https://sage.figshare.com/ndownloader/files/17773292)
Supplement: Supplementary file 1 [file 17773292]

<https://surgicaleducation.wustl.edu/median-nerve-release-in-the-forearm/>
